# Supplementary material for: A cardiac fibrosis determinative factor, Meox1, blocks direct reprogramming of cardiac myofibroblasts to cardiomyocyte-like cells
Source: Research Square preprint supplement (doi:10.21203/rs.3.rs-2928769/v1), 2023-05-22
Supplement: Supplementary file 1 [file ad821c31bb4765eea4b63b7e.xlsx]

## Sheet: shRNA
SYMBOL	OLIG_SEQ	cTnI+ cell number
shMaff-1	CCGGGCCTTCTTACAGCTGCCTTAACTCGAGTTAAGGCAGCTGTAAGAAGGCTTTTTG	8
shMaff-2	CCGGCCTGAAGGTCAAGCGCGAGTTCTCGAGAACTCGCGCTTGACCTTCAGGTTTTTG	36
shMaff-3	CCGGCAAGCGCGAGTTGAGCGAGAACTCGAGTTCTCGCTCAACTCGCGCTTGTTTTTG	3
shMaff-4	CCGGCGTGAAGCGCGTGTGCCAGAACTCGAGTTCTGGCACACGCGCTTCACGTTTTTG	7
shMaff-5	CCGGCGGCAAGTGTGAAGCGCTGCACTCGAGTGCAGCGCTTCACACTTGCCGTTTTTG	9
shBhlhe40-1	CCGGGCGAGGTTACAGTGTTTATATCTCGAGATATAAACACTGTAACCTCGCTTTTTG	46
shBhlhe40-2	CCGGGCGGTTTACAAGCTGGTGATTCTCGAGAATCACCAGCTTGTAAACCGCTTTTTG	2
shBhlhe40-3	CCGGGACCGGATTAACGAGTGCATTCTCGAGAATGCACTCGTTAATCCGGTCTTTTTG	2
shBhlhe40-4	CCGGCTGGTGATTTGTCGGGAAGAACTCGAGTTCTTCCCGACAAATCACCAGTTTTTG	9
shBhlhe40-5	CCGGGTCAGCACAATTAAGCAAGAACTCGAGTTCTTGCTTAATTGTGCTGACTTTTTG	2
shScx-1	CCGGAGGGCCTATGAACAGAGAGATCTCGAGATCTCTCTGTTCATAGGCCCTTTTTTG	1
shScx-2	CCGGCCGTGACAGAAAGACGGCGATCTCGAGATCGCCGTCTTTCTGTCACGGTTTTTG	20
shScx-3	CCGGCCTCAGCAACCAGAGAAAGTTCTCGAGAACTTTCTCTGGTTGCTGAGGTTTTTG	2
shScx-4	CCGGCTCCAGCTACATTTCTCACCTCTCGAGAGGTGAGAAATGTAGCTGGAGTTTTTG	32
shScx-5	CCGGCGGCGAGAACACCCAGCCCAACTCGAGTTGGGCTGGGTGTTCTCGCCGTTTTTG	29
shCreb3l2-1	CCGGGCAGGCTTGTTTCCACCAATACTCGAGTATTGGTGGAAACAAGCCTGCTTTTTG	1
shCreb3l2-2	CCGGCAGACGCTTATTCCTAAGATTCTCGAGAATCTTAGGAATAAGCGTCTGTTTTTG	40
shCreb3l2-3	CCGGGTCTTGTTCAACTGAGAACTTCTCGAGAAGTTCTCAGTTGAACAAGACTTTTTG	-
shCreb3l2-4	CCGGCCAGACGCTTATTCCTAAGATCTCGAGATCTTAGGAATAAGCGTCTGGTTTTTG	11
shCreb3l2-5	CCGGGCAAACTGGAAGGGAACGAAACTCGAGTTTCGTTCCCTTCCAGTTTGCTTTTTG	52
shSox4-1	CCGGCAAGAAAGTGAAGCACGTCTACTCGAGTAGACGTGCTTCACTTTCTTGTTTTT	8
shSox4-2	CCGGCAGCTCAAACTTTGAGAGCATCTCGAGATGCTCTCAAAGTTTGAGCTGTTTTT	58
shSox4-3	CCGGGCTGCTCAAGGACAGCGACAACTCGAGTTGTCGCTGTCCTTGAGCAGCTTTTT	3
shSox4-4	CCGGGCATCGTTCTCTCCAGAGCAACTCGAGTTGCTCTGGAGAGAACGATGCTTTTT	6
shHif1a-1	CCGGGCCACTTTGAATCAAAGAAATCTCGAGATTTCTTTGATTCAAAGTGGCTTTTTG	28
shHif1a-2	CCGGGCCGCTCAATTTATGAATATTCTCGAGAATATTCATAAATTGAGCGGCTTTTTG	24
shHif1a-3	CCGGCCAGTTACGATTGTGAAGTTACTCGAGTAACTTCACAATCGTAACTGGTTTTTG	18
shHif1a-4	CCGGCCCAGTGAATATTGCTTTGATCTCGAGATCAAAGCAATATTCACTGGGTTTTTG	26
shHif1a-5	CCGGCCAAAGTTGAATCAGAGGATACTCGAGTATCCTCTGATTCAACTTTGGTTTTTG	29
shRunx1-1	CCGGCCACAAAGAAATCCCTAGATACTCGAGTATCTAGGGATTTCTTTGTGGTTTTTG	-
shRunx1-2	CCGGGCCCTCCTACCATCTATACTACTCGAGTAGTATAGATGGTAGGAGGGCTTTTTG	42
shRunx1-3	CCGGGTCTTTACAAATCCGCCACAACTCGAGTTGTGGCGGATTTGTAAAGACTTTTTG	47
shRunx1-4	CCGGCACCTACCATAGAGCCATCAACTCGAGTTGATGGCTCTATGGTAGGTGTTTTTG	14
shRunx1-5	CCGGGCCCTCCTACCATCTATACTACTCGAGTAGTATAGATGGTAGGAGGGCTTTTTG	30
shFoxp1-1	CCGGCGGAAGTTAGACCACCATTTACTCGAGTAAATGGTGGTCTAACTTCCGTTTTTG	9
shFoxp1-2	CCGGCCTCAGGTTATCACTCCTCAACTCGAGTTGAGGAGTGATAACCTGAGGTTTTTG	37
shFoxp1-3	CCGGGCTAACACTAAACGAAATCTACTCGAGTAGATTTCGTTTAGTGTTAGCTTTTTG	6
shFoxp1-4	CCGGGCTTACCTCATACTCCAACAACTCGAGTTGTTGGAGTATGAGGTAAGCTTTTTG	1
shFoxp1-5	CCGGCCCAAGAGGAATGACAAGCAACTCGAGTTGCTTGTCATTCCTCTTGGGTTTTTG	40
shMeox1-1	CCGGGAAGTGGCTCCTGTGTCTAAGCTCGAGCTTAGACACAGGAGCCACTTCTTTTTG	76
shMeox1-2	CCGGCGCCAATGAGACGGAGAAGAACTCGAGTTCTTCTCCGTCTCATTGGCGTTTTTG	82
shMeox1-3	CCGGCGGAGAAGAAATCATCCAGAACTCGAGTTCTGGATGATTTCTTCTCCGTTTTTG	48
shMeox1-4	CCGGCGAATCTTCAACGAGCAGCATCTCGAGATGCTGCTCGTTGAAGATTCGTTTTTG	-
shMeox1-5	CCGGCCGGAGATATGAGATTGCAGTCTCGAGACTGCAATCTCATATCTCCGGTTTTTG	-
shId3-1	CCGGTCTTAGCCTCTTGGACGACATCTCGAGATGTCGTCCAAGAGGCTAAGATTTTTG	2
shId3-2	CCGGGCTGAGCTCACTCCGGAACTTCTCGAGAAGTTCCGGAGTGAGCTCAGCTTTTTG	10
shKlf4-1	CCGGCCAGGTAAATAAGCCTGGTTTCTCGAGAAACCAGGCTTATTTACCTGGTTTTTG	14
shKlf4-2	CCGGCTCTCTCACATGAAGCGACTTCTCGAGAAGTCGCTTCATGTGAGAGAGTTTTTG	4
shKlf4-3	CCGGCTGGACCTAGACTTTATCCTTCTCGAGAAGGATAAAGTCTAGGTCCAGTTTTTG	20
shKlf4-4	CCGGACCTATACCAAGAGTTCTCATCTCGAGATGAGAACTCTTGGTATAGGTTTTTTG	37
shKlf4-5	CCGGGCGTGAGGAACTCTCTCACATCTCGAGATGTGAGAGAGTTCCTCACGCTTTTTG	-
shMEOX1	CCGGCGCAGATATGAGATTGCGGTACTCGAGTACCGCAATCTCATATCTGCGTTTTT
shScramble		26	18	5
