# Supplementary material for: A cardiac fibrosis determinative factor, Meox1, blocks direct reprogramming of cardiac myofibroblasts to cardiomyocyte-like cells
Source: Research Square preprint supplement (doi:10.21203/rs.3.rs-2928769/v1), 2023-05-22
Supplement: Supplementary file 2 [file f4fbe1b7ef9447a06b17f973.xlsx]

## Sheet: qPCR primer
Gene	Sequence
B2m-F	TTCTGGTGCTTGTCTCACTGA
B2m-R	CAGTATGTTCGGCTTCCCATTC
Gapdh-F	AGGTCGGTGTGAACGGATTTG
Gapdh-R	TGTAGACCATGTAGTTGAGGTCA
Meox1-F	GAAACCCCCACTCAGAAGATAGC
Meox1-R	TCGTTGAAGATTCGCTCAGTC
Gata4-F	CACGCTGTGGCGTCGTAAT
Gata4-R	CTGGTTTGAATCCCCTCCTTC
Tbx5-F	ATGGCCGATACAGATGAGGG
Tbx5-R	TTCGTGGAACTTCAGCCACAG
Mef2c-F	TCTCCGCGTTCTTATCCCAC
Mef2c-R	AGGAGTTGCTACGGAAACCAC
Myocd-F	GATGGGCTCTCTCCAGATCAG
Myocd-R	GGCTGCATCATTCTTGTCACTT
Sall4-F	CCCTGGGAACTGCGATGAAG
Sall4-R	TCAGAGAGACTAAAGAACTCGGC
Tnni3-F	TCTGCCAACTACCGAGCCTAT
Tnni3-R	CTCTTCTGCCTCTCGTTCCAT
Myh6-F	GCCCAGTACCTCCGAAAGTC
Myh6-R	GCCTTAACATACTCCTCCTTGTC
Tnnt2-F	CAGAGGAGGCCAACGTAGAAG
Tnnt2-R	CTCCATCGGGGATCTTGGGT
Actc1-F	GTGCCAGGATGTGTGACGA
Actc1-R	CTGTCCCATACCCACCATGAC
Ryr2-F	AAAAGTGCGTGTTGGAGATGA
Ryr2-R	CACCGCCAATGAGATAGCCT
Ph3-F	GCTGTTCAGGTAATTCAGCAGG
Ph3-R	TCTGGGACATACTTGACTGTTGT
Aurkb-F	CAGAAGGAGAACGCCTACCC
Aurkb-R	GAGAGCAAGCGCAGATGTC
Ki67-F	ATCATTGACCGCTCCTTTAGGT
Ki67-R	GCTCGCCTTGATGGTTCCT
Postn-F	CACGGCATGGTTATTCCTTCA
Postn-R	TCAGGACACGGTCAATGACAT
Acta2-F	GTCCCAGACATCAGGGAGTAA
Acta2-R	TCGGATACTTCAGCGTCAGGA
Cthrc1-F	CAGTTGTCCGCACCGATCA
Cthrc1-R	GGTCCTTGTAGACACATTCCATT
Timp1-F	GCAACTCGGACCTGGTCATAA
Timp1-R	CGGCCCGTGATGAGAAACT
Fibronectin-F	CAGCCCCTGATTGGAGTC
Fibronectin-R	TGGGTGACACCTGAGTGAAC
B2M-F	GAGGCTATCCAGCGTACTCCA
B2M-R	CGGCAGGCATACTCATCTTTT
MEOX1-F	GGCAGCGTACCCTGACTTC
MEOX1-R	GGTCCCCATTTCCTTGGAACC
GAPDH-F	ACAACTTTGGTATCGTGGAAGG
GAPDH-R	GCCATCACGCCACAGTTTC
TCF21-F	TCCTGGCTAACGACAAATACGA
TCF21-R	TTTCCCGGCCACCATAAAGG
DDR2-F	CCAGTCAGTGGTCAGAGTCCA
DDR2-R	GGGTCCCCACCAGAGTGATAA
VIM-F	GACGCCATCAACACCGAGTT
VIM-R	CTTTGTCGTTGGTTAGCTGGT
GATA4-F	CGACACCCCAATCTCGATATG
GATA4-R	GTTGCACAGATAGTGACCCGT
TBX20-F	TCGTCCCTGTGGACAACAAG
TBX20-R	TTCAGGTTGAGCAATGAGGCT
CTHRC1-F	GTGGCTCACTTCGGCTAAAAT
CTHRC1-R	CACTAATCCAGCACCAATTCCTT
COL1A1-F	GAGGGCCAAGACGAAGACATC
COL1A1-R	CAGATCACGTCATCGCACAAC
POSTN-F	CTCATAGTCGTATCAGGGGTCG
POSTN-R	ACACAGTCGTTTTCTGTCCAC
